# Supplementary material for: Enhanced Hemolytic Activity of Mesophilic Aeromonas salmonicida SRW-OG1 Is Brought about by Elevated Temperatures
Source: MDPI journal article supplement (doi:10.3390/microorganisms10102033), 2022-10-14
Supplement: s1 [file s1]

**Table S1. Sequences of primers used in the study**

|                | Sequence (5'→3')            | Product size (bp) | T <sub>m</sub> (°C) |
|----------------|-----------------------------|-------------------|---------------------|
| <i>aerA</i> -F | 5'-CCACCTCTTTGTCCCAGTCC-3'  | 241               | 59.96               |
| <i>aerA</i> -R | 5'-CTGCTGGCCTTGTCTTGTA-3'   |                   | 59.96               |
| <i>argF</i> -F | 5'-GGTTTTTCGGCCTCGTCAAAC-3' | 215               | 60.04               |
| <i>argF</i> -R | 5'-GGTGAAACTGATGACCCCGT-3'  |                   | 59.96               |
| <i>dhaL</i> -F | 5'-CCGGATAAAGAAGGTGCCGT-3'  | 228               | 60.11               |
| <i>dhaL</i> -R | 5'-TGCGAACACATCTTCACCGA-3'  |                   | 59.97               |
| <i>arcA</i> -F | 5'-TCAGAATTCCGTGCCATGCT-3'  | 215               | 60.04               |
| <i>arcA</i> -R | 5'-TCACCACAGAAACGGTAGCC-3'  |                   | 59.97               |
| <i>dhaK</i> -F | 5'-ATCCGGAGTCGGGGAAGTAA-3'  | 211               | 60.03               |
| <i>dhaK</i> -R | 5'-ACAACCTGATGGGGATGGCAG-3' |                   | 60.03               |
| <i>hlyA</i> -F | 5'-ACCGGATGGTTCCAATCCAC-3'  | 247               | 60.03               |
| <i>hlyA</i> -R | 5'-TCCAGCCGCTGAGTTACAAG-3'  |                   | 60.04               |
| <i>pdhR</i> -F | 5'-CGCAGCATAGTAGGCACAGA-3'  | 231               | 59.90               |
| <i>pdhR</i> -R | 5'-CTCGCCATCCAGTTTCAGGT-3'  |                   | 60.04               |
| <i>gntU</i> -F | 5'-TAGCCAAAATCGGCTCCCAG-3'  | 217               | 60.11               |
| <i>gntU</i> -R | 5'-TGTCACTGACTGGCTTCGTC-3'  |                   | 59.97               |
| <i>fruB</i> -F | 5'-CTCTGCTGGCAAGCAAACCTG-3' | 232               | 60.04               |
| <i>fruB</i> -R | 5'-GCGATACCGATGGCCACATA-3'  |                   | 60.04               |
| <i>yidD</i> -F | 5'-TTTCTTCGCTTTGGTTGCGG-3'  | 226               | 59.97               |
| <i>yidD</i> -R | 5'-CGTTGCAATGGGTAGCTGTC-3'  |                   | 59.55               |
| <i>aqpZ</i> -F | 5'-CATGACCGGCTTCTTCCTGT-3'  | 220               | 60.04               |
| <i>aqpZ</i> -R | 5'-GATCGGAGCAACCCAGAACA-3'  |                   | 60.04               |
| <i>aceA</i> -F | 5'-TGGCATCGTCCAGGTTCTTC-3'  | 209               | 60.04               |
| <i>aceA</i> -R | 5'-CTACAAAGTGCAGGCGGGTA-3'  |                   | 60.04               |

|                |                            |     |       |
|----------------|----------------------------|-----|-------|
| <i>hppD</i> -F | 5'-ATCACCTGACCCACAACGTC-3' | 233 | 59.97 |
| <i>hppD</i> -R | 5'-GATCCCCTCCCCCTTGTA-3'   |     | 60.03 |
| <i>fadA</i> -F | 5'-TCGAGCTGAACGAGGCATTT-3' | 203 | 60.04 |
| <i>fadA</i> -R | 5'-CATGGTGGCAAGACCCAGAT-3' |     | 60.03 |
| <i>yjjW</i> -F | 5'-CGGCATCCAGAAAATCGCTG-3' | 249 | 59.97 |
| <i>yjjW</i> -R | 5'-ATCTGGCTCACCTCACTTGC-3' |     | 60.04 |
| <i>nirD</i> -F | 5'-TGCCAACTCAACGACATCCT-3' | 211 | 59.60 |
| <i>nirD</i> -R | 5'-GAAAGCGCTGCTTCTTGAGC-3' |     | 60.45 |
| <i>nirC</i> -F | 5'-CTCACCTTCGGGGTGAAGAC-3' | 206 | 60.04 |
| <i>nirC</i> -R | 5'-TTCATGAACAGGGTCAGGGC-3' |     | 59.96 |
| <i>treB</i> -F | 5'-GCCAGCAGCAGGGAGATAAA-3' | 249 | 60.11 |
| <i>treB</i> -R | 5'-GATCCTCGGTATCGTGCTGG-3' |     | 60.04 |
| <i>treC</i> -F | 5'-GCTCCTGATAATCCCCCTGC-3' | 231 | 59.96 |
| <i>treC</i> -R | 5'-CCATTCTCGGTGCCAAGTCT-3' |     | 60.04 |
| <i>l6S</i> -F  | 5'-AGTACGGCCGCAAGGTAAAA-3' | 245 | 59.96 |
| <i>l6S</i> -R  | 5'-GTGCTGGCAACAAAGGACAG-3' |     | 59.97 |
| <i>gyrB</i> -F | 5'-AAGGCCCGTTTCGACAAGAT-3' | 219 | 59.96 |
| <i>gyrB</i> -R | 5'-GATGTAGCCACGCTCGATGA-3' |     | 59.97 |

---
